# Supplementary figures and images for: A Systems Biological Approach to Understanding the Mechanisms Underlying the Therapeutic Potential of Red Ginseng Supplements against Metabolic Diseases
Source: MDPI journal article supplement (doi:10.3390/molecules25081967), 2020-04-23

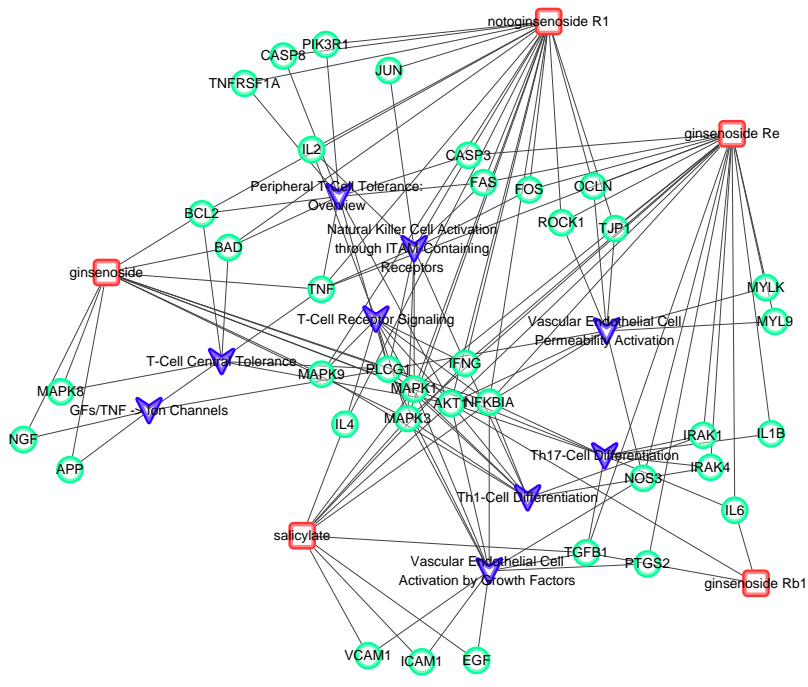

Supplement: s1 [file s1]

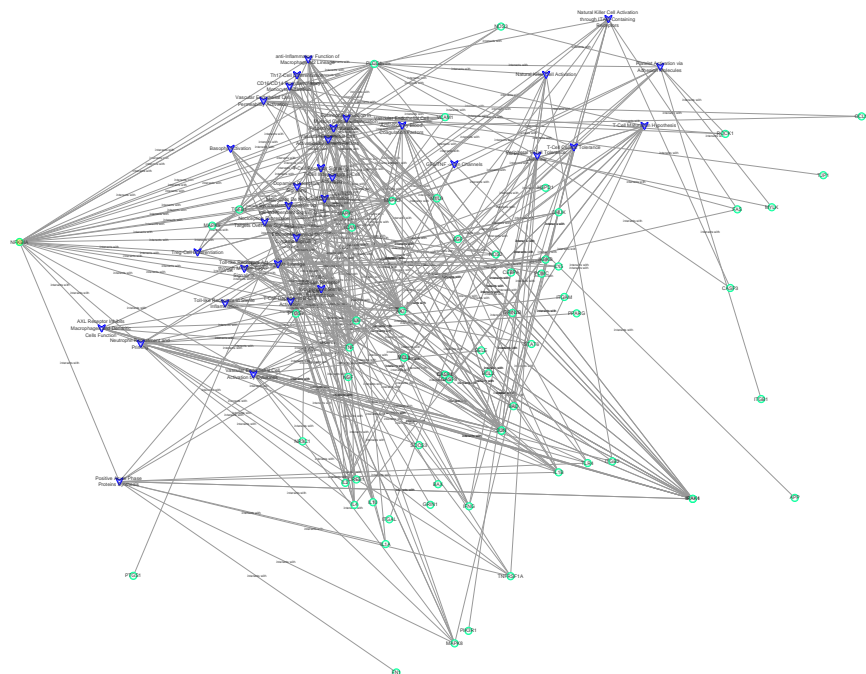

Supplement: s1 [file s1]

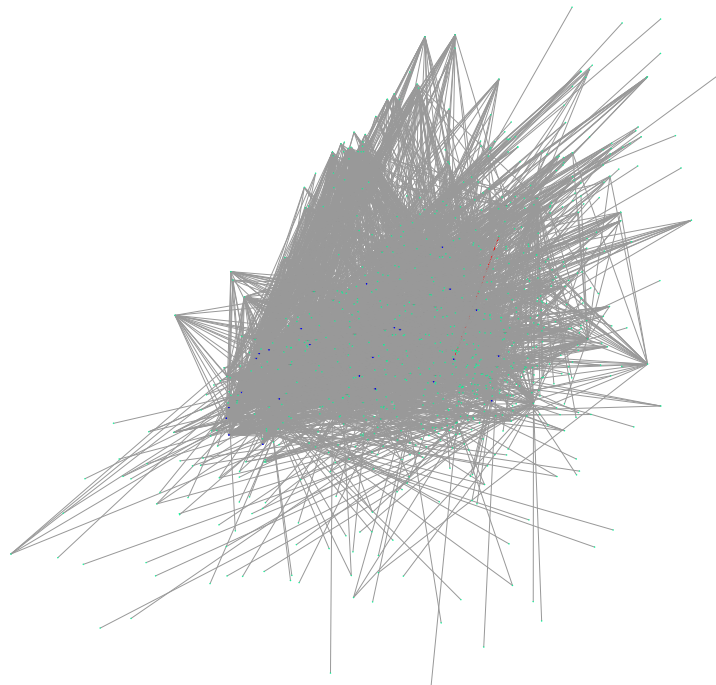

Supplement: s1 [file s1]
